# Supplementary material for: Insight on lithium polysulfide intermediates in a Li/S battery by density functional theory
Source: Royal Society of Chemistry journal article supplement (doi:10.1039/c7ra04673a), 2017-01-01
Supplement: c7ra04673a1.pdf [file c7ra04673a1.pdf]

## Supplementary information

### **Insight on lithium polysulfide intermediates in Li/S battery by density functional theory**

Qi Liu<sup>a</sup>, Daobin Mu<sup>a,b\*</sup>, Borong Wu<sup>a,b\*</sup>, Lei Wang<sup>a</sup>, Liang Gai<sup>a</sup>, Feng Wu<sup>a,b</sup>

<sup>a</sup> Beijing Key Laboratory of Environment Science and Engineering, School of Material Science and Engineering, Beijing Institute of Technology, Beijing 100081, China

<sup>b</sup> Collaborative Innovation Center of Electric Vehicles in Beijing, Beijing, 100081, China

**Table S1** Distances of all S-S bonds in lithium polysulfides after optimization in DOL solvent, and the distance unit is Å.

| DOL                            | S <sup>1</sup> -S <sup>2</sup> | S <sup>2</sup> -S <sup>3</sup> | S <sup>3</sup> -S <sup>4</sup> | S <sup>4</sup> -S <sup>5</sup> | S <sup>5</sup> -S <sup>6</sup> | S <sup>6</sup> -S <sup>7</sup> | S <sup>7</sup> -S <sup>8</sup> |
|--------------------------------|--------------------------------|--------------------------------|--------------------------------|--------------------------------|--------------------------------|--------------------------------|--------------------------------|
| Li <sub>2</sub> S <sub>2</sub> | 2.20189                        | -                              | -                              | -                              | -                              | -                              | -                              |
| Li <sub>2</sub> S <sub>3</sub> | 2.14693                        | 2.12456                        | -                              | -                              | -                              | -                              | -                              |
| Li <sub>2</sub> S <sub>4</sub> | 2.12243                        | 2.10735                        | 2.12132                        | -                              | -                              | -                              | -                              |
| Li <sub>2</sub> S <sub>5</sub> | 2.10766                        | 2.12658                        | 2.11271                        | 2.10400                        | -                              | -                              | -                              |
| Li <sub>2</sub> S <sub>6</sub> | 2.10135                        | 2.12399                        | 2.14055                        | 2.10063                        | 2.08735                        | -                              | -                              |
| Li <sub>2</sub> S <sub>7</sub> | 2.09159                        | 2.09946                        | 2.13469                        | 2.12781                        | 2.11365                        | 2.08695                        | -                              |
| Li <sub>2</sub> S <sub>8</sub> | 2.08069                        | 2.09840                        | 2.15181                        | 2.09993                        | 2.14279                        | 2.11088                        | 2.08087                        |

**Table S2** Distances of all S-S bonds in lithium polysulfides after optimization in DME solvent, and the distance unit is Å.

| DME                            | S <sup>1</sup> -S <sup>2</sup> | S <sup>2</sup> -S <sup>3</sup> | S <sup>3</sup> -S <sup>4</sup> | S <sup>4</sup> -S <sup>5</sup> | S <sup>5</sup> -S <sup>6</sup> | S <sup>6</sup> -S <sup>7</sup> | S <sup>7</sup> -S <sup>8</sup> |
|--------------------------------|--------------------------------|--------------------------------|--------------------------------|--------------------------------|--------------------------------|--------------------------------|--------------------------------|
| Li <sub>2</sub> S <sub>2</sub> | 2.21815                        | -                              | -                              | -                              | -                              | -                              | -                              |
| Li <sub>2</sub> S <sub>3</sub> | 2.17060                        | 2.12733                        | -                              | -                              | -                              | -                              | -                              |
| Li <sub>2</sub> S <sub>4</sub> | 2.10845                        | 2.16787                        | 2.10845                        | -                              | -                              | -                              | -                              |
| Li <sub>2</sub> S <sub>5</sub> | 2.13036                        | 2.10508                        | 2.10587                        | 2.12093                        | -                              | -                              | -                              |
| Li <sub>2</sub> S <sub>6</sub> | 2.10600                        | 2.09059                        | 2.13978                        | 2.09059                        | 2.10601                        | -                              | -                              |
| Li <sub>2</sub> S <sub>7</sub> | 2.10778                        | 2.09207                        | 2.11718                        | 2.12543                        | 2.09536                        | 2.09715                        | -                              |
| Li <sub>2</sub> S <sub>8</sub> | 2.09488                        | 2.08775                        | 2.14047                        | 2.09418                        | 2.14003                        | 2.08737                        | 2.09505                        |

**Table S3** The energy of polysulfide ions, lithium ions, lithium polysulfides and binding energy between polysulfide ions and lithium ions in DOL solvation.

|           | $S_n^{2-}$<br>(Ha) | $2Li^+$<br>(Ha) | $Li_2S_n$<br>(Ha) | Binding<br>energy(Ha) | Binding<br>energy(Kcal/mol) |
|-----------|--------------------|-----------------|-------------------|-----------------------|-----------------------------|
| $Li_2S$   | -398.065           | -14.452         | -413.340          | 0.823                 | 516.455                     |
| $Li_2S_2$ | -796.354           | -14.450         | -811.599          | 0.795                 | 498.686                     |
| $Li_2S_3$ | -1194.636          | -14.477         | -1209.814         | 0.701                 | 439.887                     |
| $Li_2S_4$ | -1592.904          | -14.490         | -1608.041         | 0.648                 | 406.340                     |
| $Li_2S_5$ | -1991.155          | -14.486         | -2006.275         | 0.633                 | 397.381                     |
| $Li_2S_6$ | -2389.406          | -14.496         | -2404.507         | 0.605                 | 379.752                     |
| $Li_2S_7$ | -2787.643          | -14.488         | -2802.736         | 0.605                 | 379.540                     |
| $Li_2S_8$ | -3185.881          | -14.489         | -3200.965         | 0.595                 | 373.480                     |

**Table S4** The energy of polysulfide ions, lithium ions, lithium polysulfides and binding energy between polysulfide ions and lithium ions in DME solvation.

|           | $S_n^{2-}$<br>(Ha) | $2Li^+$<br>(Ha) | $Li_2S_n$<br>(Ha) | Binding<br>energy(Ha) | Binding<br>energy(Kcal/mol) |
|-----------|--------------------|-----------------|-------------------|-----------------------|-----------------------------|
| $Li_2S$   | -398.065           | -14.448         | -413.346          | 0.833                 | 522.806                     |
| $Li_2S_2$ | -796.354           | -14.441         | -811.612          | 0.817                 | 512.617                     |
| $Li_2S_3$ | -1194.635          | -14.437         | -1209.854         | 0.782                 | 490.810                     |
| $Li_2S_4$ | -1592.900          | -14.448         | -1608.085         | 0.738                 | 462.799                     |
| $Li_2S_5$ | -1991.138          | -14.399         | -2006.339         | 0.802                 | 503.175                     |
| $Li_2S_6$ | -2389.391          | -14.404         | -2404.574         | 0.779                 | 488.801                     |
| $Li_2S_7$ | -2787.632          | -14.405         | -2802.801         | 0.765                 | 479.996                     |
| $Li_2S_8$ | -3185.873          | -14.413         | -3201.030         | 0.745                 | 467.472                     |

**Table S5** The binding energies between polysulfide ions and lithium ions in DOL solvation, the energy is corrected by Basis Set Superposition Error (BSSE). The unit is kcal/mol.

| DOL               | $Li_2S$ | $Li_2S_2$ | $Li_2S_3$ | $Li_2S_4$ | $Li_2S_5$ | $Li_2S_6$ | $Li_2S_7$ | $Li_2S_8$ |
|-------------------|---------|-----------|-----------|-----------|-----------|-----------|-----------|-----------|
| BSSE              | 0.99084 | 1.34426   | 1.14259   | 1.03896   | 1.0484    | 1.0857    | 1.11414   | 1.15713   |
| Binding<br>energy | 515.464 | 497.342   | 438.744   | 405.301   | 396.333   | 378.666   | 378.426   | 372.323   |

**Table S6** The binding energies between polysulfide ions and lithium ions in DME solvation, the energy is corrected by BSSE. The unit is kcal/mol.

| DME    | Li <sub>2</sub> S | Li <sub>2</sub> S <sub>2</sub> | Li <sub>2</sub> S <sub>3</sub> | Li <sub>2</sub> S <sub>4</sub> | Li <sub>2</sub> S <sub>5</sub> | Li <sub>2</sub> S <sub>6</sub> | Li <sub>2</sub> S <sub>7</sub> | Li <sub>2</sub> S <sub>8</sub> |
|--------|-------------------|--------------------------------|--------------------------------|--------------------------------|--------------------------------|--------------------------------|--------------------------------|--------------------------------|
| BSSE   | 1.0446            | 1.4293                         | 1.4352                         | 1.5362                         | 1.5320                         | 1.4044                         | 1.5422                         | 1.5378                         |
|        | 2                 | 4                              | 3                              | 5                              | 8                              | 6                              | 5                              | 3                              |
| Bindin | 521.76            | 511.18                         | 489.37                         | 461.26                         | 501.64                         | 487.39                         | 478.45                         | 465.93                         |
| g      | 1                 | 8                              | 5                              | 3                              | 3                              | 7                              | 4                              | 4                              |
| energy |                   |                                |                                |                                |                                |                                |                                |                                |

**Table S7** Distances of Li-S bonds after optimization in DOL and DME, respectively; and the distance unit is Å.

|                                | DOL     |         | DME     |         |
|--------------------------------|---------|---------|---------|---------|
| Li <sub>2</sub> S              | 2.25753 | 2.25832 | 2.17529 | 2.17529 |
| Li <sub>2</sub> S <sub>2</sub> | 2.39106 | 2.39301 | 2.32978 | 2.33183 |
| Li <sub>2</sub> S <sub>3</sub> | 2.35952 | 2.38079 | 2.34182 | 2.41264 |
| Li <sub>2</sub> S <sub>4</sub> | 2.36824 | 2.37939 | 2.40977 | 2.40985 |
| Li <sub>2</sub> S <sub>5</sub> | 2.39378 | 2.38893 | 2.48436 | 2.52353 |
| Li <sub>2</sub> S <sub>6</sub> | 2.38463 | 2.37727 | 2.48595 | 2.48556 |
| Li <sub>2</sub> S <sub>7</sub> | 2.40748 | 2.39998 | 2.49301 | 2.48415 |
| Li <sub>2</sub> S <sub>8</sub> | 2.40267 | 2.40697 | 2.50133 | 2.50186 |

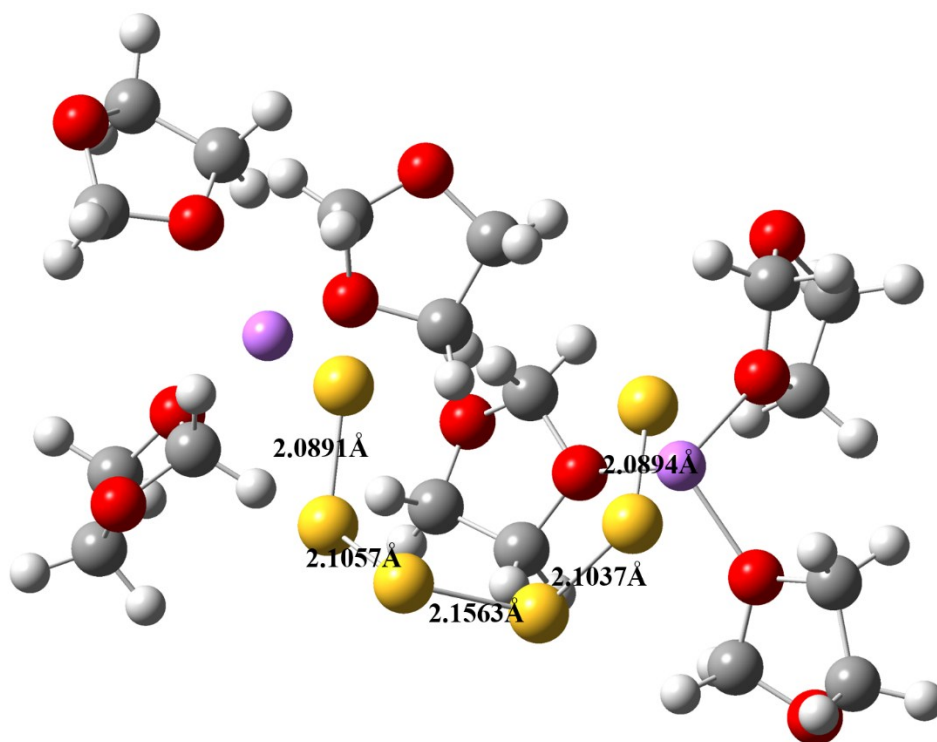

**Fig. S1** The solvation structure of  $\text{Li}_2\text{S}_6$  which is surrounded by six DOL molecules. The outer solvation shells are also considered by using the polarized continuum model in DOL solvent (dielectric constant of 7.1). Dark gray, white, red, yellow and violet spheres denote C, H, O, S and Li atoms/ions, respectively.

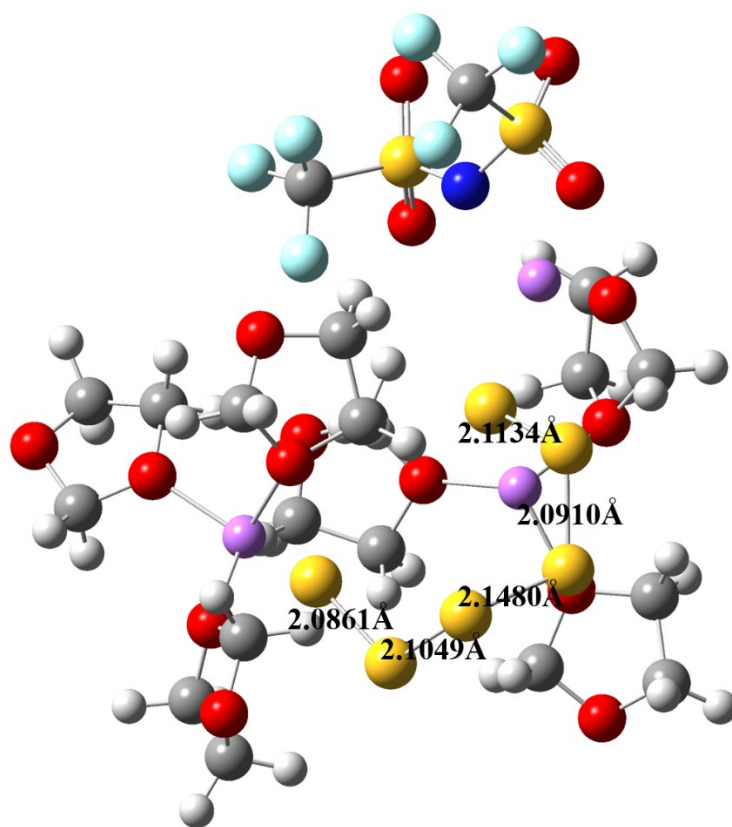

**Fig. S2** The solvation structure of  $\text{Li}_2\text{S}_6$  which is surrounded by six DOL molecules and one LiTFSI molecule. Dark gray, white, red, yellow, violet, light blue and dark blue spheres denote C, H, O, S, Li, F and N atoms/ions, respectively.



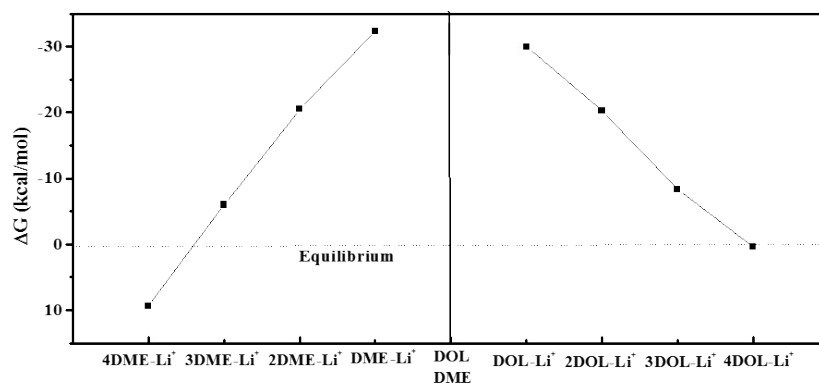

**Fig.S3** The curve of Gibbs free energy ( $\Delta G$ ) of  $\text{Li}^+$  solvation with DOL/DME molecule as solvent number changes by DFT calculation.

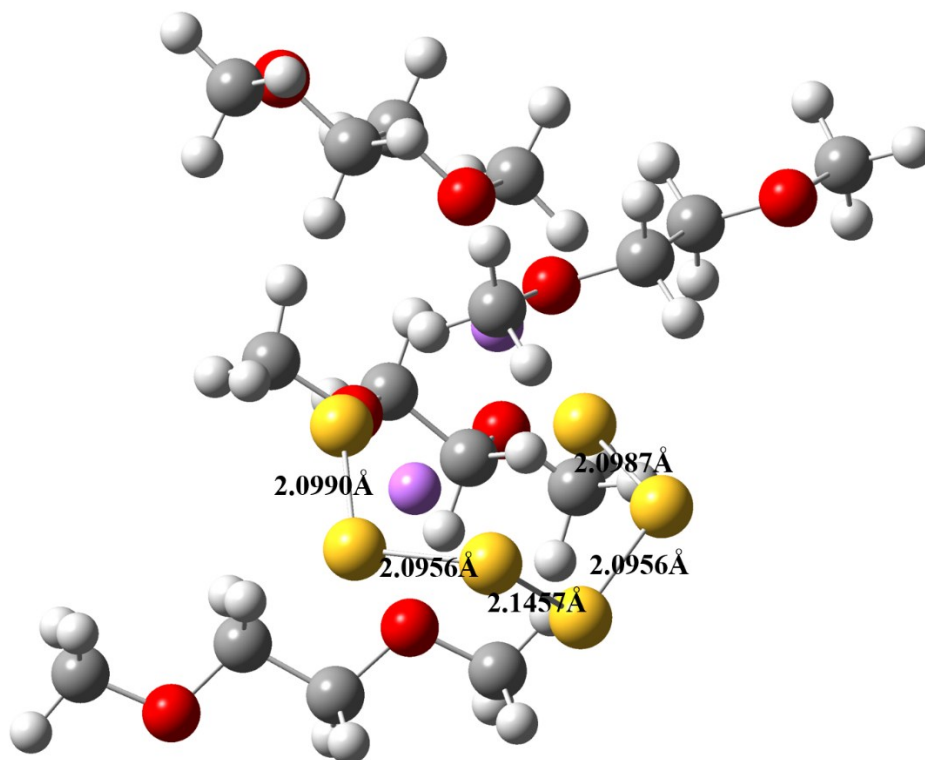

**Fig. S4** The solvation structure of  $\text{Li}_2\text{S}_6$  which is surrounded by for DME molecules. The outer solvation shells are also considered by using the polarized continuum model in DME solvent (dielectric constant of 7.2). Dark gray, white, red, yellow and violet spheres denote C, H, O, S and Li atoms/ions, respectively.

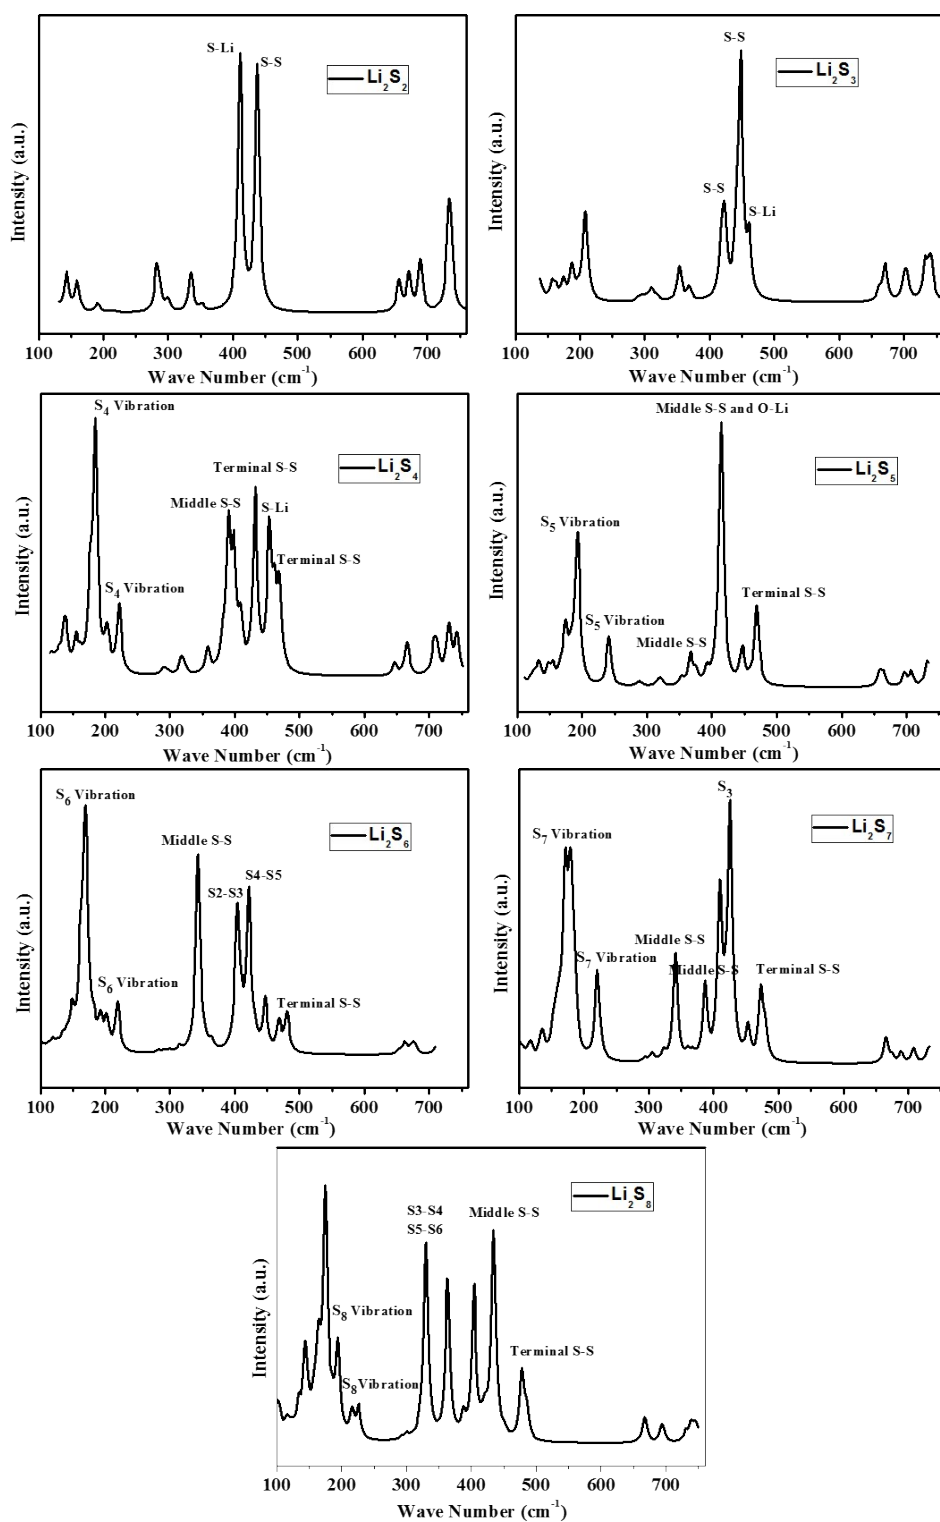

**Fig. S5** The calculated Raman spectroscopy of lithium polysulfides in DOL solvation structure.
